# Supplementary material
Source: publisher figshare collection journal article supplement (https://springernature.figshare.com/ndownloader/files/20317566)
Supplement: Supplementary file 1 [file 20317566]

## Sheet: CCA quenching
conc (uM)	CONTROL				AVERAGE		SE
0	37	40	42		39.6667		1.45297
0.5	92	106	112		103.333		5.92546
1	134	168	170		157.333		11.6809
1.5	187	222	244		217.667		16.5965
2	241	289	283		271		15.0997
2.5	288	356	347		330.333		21.3255
3	331	405	406		380.667		24.835
3.5	376	476	509		453.667		39.9847
4	444	545	534		507.667		31.9913
4.5	518	599	597		571.333		26.6729
5	1111	1256	1327		1231.33		63.5619
conc (uM)	Ti				AVERAGE		SE
0	57	55	57		56.3333		0.666667
0.5	157	148	150		151.667		2.72845
1	228	239	242		236.333		4.25572
1.5	334	327	338		333		3.21455
2	444	441	426		437		5.56776
2.5	518	514	522		518		2.3094
3	606	611	605		607.333		1.85592
3.5	697	727	746		723.333		14.2634
4	825	816	814		818.333		3.38296
4.5	884	882	906		890.667		7.68838
5	1911	1990	1942		1947.67		22.9807
conc (uM)	Cr				AVERAGE		SE
0	41	39	40		40		0.57735
0.35	113	112	114		113		0.57735
0.7	188	185	182		185		1.73205
1.05	240	254	245		246.333		4.09607
1.4	305	307	311		307.667		1.76383
1.75	384	380	389		384.333		2.60342
2.1	442	458	467		455.667		7.31057
2.45	509	514	515		512.667		1.85592
2.8	563	564	570		565.667		2.18581
3.15	640	648	653		647		3.78594
3.5	1433	1415	1470		1439.33		16.1898
conc (uM)	Er				AVERAGE		SE
0	39	38	39		38.6667		0.333333
0.35	260	257	267		261.333		2.96273
0.7	503	479	467		483		10.583
1.05	712	742	743		732.333		10.1708
1.4	998	974	933		968.333		18.9766
1.75	1193	1184	1207		1194.67		6.69162
2.1	1458	1320	1509		1429		56.4535
2.45	1716	1687	1872		1758.33		57.4466
2.8	1859	1853	1860		1857.33		2.18581
3.15	2276	2029	2054		2119.67		78.4991
3.5	4788	4315	4697		4600		144.901
conc (uM)	Co				AVERAGE		SE
0	38	40	35		37.6667		1.45297
0.35	78	104	111		97.6667		10.0388
0.7	288	188	192		222.667		32.6871
1.05	295	256	257		269.333		12.8366
1.4	412	327	333		357.333		27.3882
1.75	335	410	405		383.333		24.2097
2.1	308	478	507		431		62.0672
2.45	304	542	567		471		83.8113
2.8	391	615	605		537		73.0571
3.15	678	691	703		690.667		7.2188
3.5	1809	1514	1578		1633.67		89.5923
conc (uM)	Nd				AVERAGE		SE
0	51	49	49		49.6667		0.666667
0.35	313	320	332		321.667		5.54777
0.7	589	606	604		599.667		5.36449
1.05	844	842	872		852.667		9.68389
1.4	1121	1109	1120		1116.67		3.84419
1.75	1395	1410	1405		1403.33		4.40959
2.1	1667	1708	1652		1675.67		16.7365
2.45	1937	1953	1941		1943.67		4.8074
2.8	2215	2139	2138		2164		25.5016
3.15	2432	2481	2473		2462		15.1767
3.5	5439	5588	5528		5518.33		43.2833
conc (uM)	Dy				AVERAGE		SE
0	42	45	47		44.6667		1.45297
0.35	209	207	209		208.333		0.666667
0.7	390	360	368		372.667		8.96908
1.05	565	533	547		548.333		9.26163
1.4	695	688	690		691		2.08167
1.75	815	836	840		830.333		7.75314
2.1	977	986	1029		997.333		16.0451
2.45	1270	1314	1305		1296.33		13.4205
2.8	1437	1418	1438		1431		6.50641
3.15	1591	1597	1598		1595.33		2.18581
3.5	3454	3552	3626		3544		49.813
conc (uM)	Sm				AVERAGE		SE
0	46	47	49		47.3333		0.881917
0.35	272	268	278		272.667		2.90593
0.7	504	503	504		503.667		0.333333
1.05	718	710	693		707		7.37111
1.4	910	905	895		903.333		4.40959
1.75	1069	1167	1095		1110.33		29.3106
2.1	1354	1351	1339		1348		4.58258
2.45	1582	1539	1505		1542		22.2785
2.8	1722	1669	1671		1687.33		17.3429
3.15	1862	1869	1904		1878.33		12.9915
3.5	4321	4322	4265		4302.67		18.8355
conc (uM)	Zr				AVERAGE		SE
0	43	50	53		48.6667		2.96273
0.35	110	111	117		112.667		2.18581
0.7	191	171	176		179.333		6.00925
1.05	242	242	257		247		5
1.4	308	303	311		307.333		2.33333
1.75	391	365	372		376		7.76745
2.1	429	425	431		428.333		1.76383
2.45	490	494	504		496		4.16333
2.8	542	556	565		554.333		6.69162
3.15	602	611	631		614.667		8.56997
3.5	1322	1298	1335		1318.33		10.8372
conc (uM)	Gd				AVERAGE		SE
0	51	48	46		48.3333		1.45297
0.35	434	440	453		442.333		5.60753
0.7	850	881	925		885.333		21.7588
1.05	1252	1221	1238		1237		8.96289
1.4	1587	1562	1630		1593		19.8578
1.75	1970	1985	1991		1982		6.245
2.1	2362	2497	2578		2479		63
2.45	2822	2842	2785		2816.33		16.6966
2.8	3105	3067	3066		3079.33		12.8366
3.15	3450	3523	3543		3505.33		28.2627
3.5	7776	7839	8466		8027		220.252
conc (uM)	Eu				AVERAGE		SE
0	54	56	59		56.3333		1.45297
0.35	618	629	633		626.667		4.48454
0.7	1193	1175	1215		1194.33		11.5662
1.05	1783	1774	1733		1763.33		15.3876
1.4	2283	2352	2412		2349		37.2693
1.75	2897	2955	3011		2954.33		32.9107
2.1	3356	3395	3400		3383.67		13.9084
2.45	3947	4057	3961		3988.33		34.5704
2.8	4463	4519	4564		4515.33		29.2138
3.15	4999	5107	5100		5068.67		34.8919
3.5	10992	11203	11058		11084.3		62.3173
conc (uM)	Tb				AVERAGE		SE
0	36	33	38		35.6667		1.45297
0.35	105	94	99		99.3333		3.1798
0.7	215	158	170		181		17.3494
1.05	258	235	229		240.667		8.83805
1.4	328	277	304		303		14.7309
1.75	394	369	378		380.333		7.31057
2.1	454	431	441		442		6.65833
2.45	495	484	501		493.333		4.97773
2.8	614	543	580		579		20.502
3.15	614	662	673		649.667		18.1138
3.5	1325	1416	1305		1348.67		34.1581
conc (uM)	Mo				AVERAGE		SE
0	65	70	74		69.6667		2.60342
0.35	84	85	82		83.6667		0.881917
0.7	95	93	91		97		1.1547
1.05	109	114	113		112		1.52753
1.4	125	124	129		126		1.52753
1.75	137	141	141		139.667		1.33333
2.1	142	151	143		145.333		2.848
2.45	161	176	178		171.667		5.36449
2.8	179	175	169		174.333		2.90593
3.15	180	179	182		180.333		0.881917
3.5	318	326	329		324.333		3.28295
conc (uM)	Sc				AVERAGE		SE
0	45	48	51		48		1.73205
0.35	121	119	121		120.333		0.666667
0.7	181	180	181		180.667		0.333333
1.05	261	252	258		257		2.64575
1.4	327	320	340		329		5.85947
1.75	402	390	396		396		3.4641
2.1	468	460	446		458		6.4291
2.45	538	519	535		530.667		5.89727
2.8	603	603	613		606.333		3.33333
3.15	658	649	676		661		7.93725
3.5	1452	1462	1454		1456		3.05505
conc (uM)	Hf				AVERAGE		SE
0	49	54	57		53.3333		2.33333
0.35	124	133	120		125.667		3.84419
0.7	201	193	208		200.667		4.33333
1.05	276	269	287		277.333		5.23874
1.4	353	350	347		350		1.73205
1.75	411	422	408		413.667		4.25572
2.1	498	486	490		491.333		3.52767
2.45	579	708	586		624.333		41.8821
2.8	646	674	657		659		8.14453
3.15	999	720	728		815.667		91.6958
3.5	1573	1528	1584		1561.67		17.1302
conc (uM)	V				AVERAGE		SE
0	36	39	36		37		1
0.35	46	46	47		46.3333		0.333333
0.7	53	45	47		48.3333		2.4037
1.05	49	50	51		50		0.57735
1.4	54	60	59		57.6667		1.85592
1.75	63	66	65		64.6667		0.881917
2.1	61	65	64		63.3333		1.20185
2.45	76	70	70		72		2
2.8	72	76	72		73.3333		1.33333
3.15	87	79	84		83.3333		2.33333
3.5	131	131	131		131		0
conc (uM)	Ni				AVERAGE		SE
0	36	37	36		36.3333		0.333333
0.35	115	121	121		119		2
0.7	193	199	257		216.333		20.407
1.05	287	274	267		276		5.85947
1.4	367	369	351		362.333		5.696
1.75	439	441	454		444.667		4.70225
2.1	534	544	551		543		4.93288
2.45	621	617	606		614.667		4.48454
2.8	685	701	706		697.333		6.33333
3.15	770	802	814		795.333		13.1318
3.5	1736	1740	1720		1732		6.1101
conc (uM)	Cu				AVERAGE		SE
0	39	39	43		40.3333		1.33333
0.35	111	105	106		107.333		1.85592
0.7	171	179	173		174.333		2.4037
1.05	243	245	262		250		6.02771
1.4	312	316	314		314		1.1547
1.75	400	376	375		383.667		8.17177
2.1	454	460	468		460.667		4.05518
2.45	536	547	555		546		5.50757
2.8	592	649	607		616		17.0587
3.15	668	669	649		662		6.50641
3.5	1502	1482	1453		1479		14.2244
conc (uM)	Si				AVERAGE		SE
0	39	41	44		41.3333		1.45297
0.35	105	108	105		106		1
0.7	164	168	167		166.333		1.20185
1.05	223	233	230		228.667		2.96273
1.4	289	303	309		300.333		5.92546
1.75	376	364	370		370		3.4641
2.1	419	417	426		420.667		2.72845
2.45	474	484	492		483.333		5.20683
2.8	543	548	575		555.333		9.9387
3.15	628	612	646		628.667		9.82061
3.5	1310	1337	1339		1328.67		9.35117
conc (uM)	Al				AVERAGE		SE
0	39	39	39		39		0
0.35	121	120	128		123		2.51661
0.7	208	209	202		206.333		2.18581
1.05	291	307	307		301.667		5.33333
1.4	368	357	366		363.667		3.38296
1.75	462	442	448		450.667		5.92546
2.1	524	528	543		531.667		5.78312
2.45	616	633	642		630.333		7.62306
2.8	692	691	676		686.333		5.17472
3.15	753	764	775		764		6.35085
3.5	1644	1638	1648		1643.33		2.90593
conc (uM)	Fe				AVERAGE		SE
0	37	35	38		36.6667		0.881917
0.35	95	89	100		94.6667		3.1798
0.7	155	159	154		156		1.52753
1.05	225	223	222		223.333		0.881917
1.4	280	284	288		284		2.3094
1.75	377	355	358		363.333		6.88799
2.1	423	439	435		432.333		4.8074
2.45	495	484	487		488.667		3.28295
2.8	541	551	549		547		3.05505
3.15	621	630	639		630		5.19615
3.5	1298	1331	1319		1316		9.64365
conc (uM)	Zn				AVERAGE		SE
0	65	42	44		50.3333		7.35603
0.35	187	187	186		186.667		0.333333
0.7	334	333	334		333.667		0.333333
1.05	474	472	477		474.333		1.45297
1.4	595	629	633		619		12.0554
1.75	783	759	788		776.667		8.95048
2.1	911	920	943		924.667		9.52774
2.45	1059	1047	1067		1057.67		5.81187
2.8	1201	1183	1194		1192.67		5.23874
3.15	1342	1345	1361		1349.33		5.89727
3.5	3048	2970	3076		3031.33		31.714
conc (uM)	Mn				AVERAGE		SE
0	37	39	46		40.6667		2.72845
0.35	92	86	87		88.3333		1.85592
0.7	148	138	143		143		2.88675
1.05	193	192	204		196.333		3.84419
1.4	245	249	252		248.667		2.02759
1.75	300	305	296		300.333		2.60342
2.1	355	357	355		355.667		0.666667
2.45	408	415	418		413.667		2.96273
2.8	461	475	486		474		7.23418
3.15	524	532	538		531.333		4.05518
3.5	1147	1106	1149		1134		14.0119

## Sheet: DHE quenching
conc (uM)	CONTROL				AVERAGE		SE
0	9	10	10		9.66667		0.333333
0.35	14	16	15		15		0.57735
0.7	20	19	19		19.3333		0.333333
1.05	21	23	22		22		0.57735
1.4	25	29	30		28		1.52753
1.75	30	35	37		34		2.08167
2.1	38	42	41		40.3333		1.20185
2.45	40	48	49		45.6667		2.848
2.8	48	57	53		52.6667		2.60342
3.15	48	61	57		55.3333		3.84419
3.5	56	70	68		64.6667		4.37163
conc (uM)	Mn				AVERAGE		SE
0	9	10	9		9.33333		0.333333
0.35	14	12	14		13.3333		0.666667
0.7	18	17	19		18		0.57735
1.05	24	23	24		23.6667		0.333333
1.4	28	29	32		29.6667		1.20185
1.75	32	32	38		34		2
2.1	38	40	40		39.3333		0.666667
2.45	46	44	44		44.6667		0.666667
2.8	50	52	51		51		0.57735
3.15	58	58	57		57.6667		0.333333
3.5	64	68	66		66		1.1547
conc (uM)	Cr				AVERAGE		SE
0	11	10	10		10.3333		0.333333
0.35	13	14	13		13.3333		0.333333
0.7	22	20	20		20.6667		0.666667
1.05	24	23	26		24.3333		0.881917
1.4	28	34	30		30.6667		1.76383
1.75	36	41	38		38.3333		1.45297
2.1	46	44	44		44.6667		0.666667
2.45	50	49	52		50.3333		0.881917
2.8	56	53	55		54.6667		0.881917
3.15	65	67	64		65.3333		0.881917
3.5	70	75	71		72		1.52753
conc (uM)	Er				AVERAGE		SE
0	10	11	11		10.6667		0.333333
0.35	15	18	16		16.3333		0.881917
0.7	26	26	22		24.6667		1.33333
1.05	31	27	29		29		1.1547
1.4	35	35	37		35.6667		0.666667
1.75	43	43	45		43.6667		0.666667
2.1	52	49	51		50.6667		0.881917
2.45	53	53	59		55		2
2.8	65	66	62		64.3333		1.20185
3.15	79	70	74		74.3333		2.60342
3.5	79	77	77		77.6667		0.666667
conc (uM)	Co				AVERAGE		SE
0	10	7	8		8.33333		0.881917
0.35	11	12	11		11.3333		0.333333
0.7	17	19	15		17		1.1547
1.05	22	23	25		23.3333		0.881917
1.4	29	29	29		29		0
1.75	33	35	35		34.3333		0.666667
2.1	36	41	42		39.6667		1.85592
2.45	50	48	47		48.3333		0.881917
2.8	53	54	50		52.3333		1.20185
3.15	52	61	63		58.6667		3.38296
3.5	63	61	65		63		1.1547
conc (uM)	Nd				AVERAGE		SE
0	12	12	12		12		0
0.35	17	17	18		17.3333		0.333333
0.7	20	22	25		22.3333		1.45297
1.05	29	28	28		28.3333		0.333333
1.4	35	32	36		34.3333		1.20185
1.75	43	45	44		44		0.57735
2.1	52	51	53		52		0.57735
2.45	58	54	57		56.3333		1.20185
2.8	68	65	66		66.3333		0.881917
3.15	77	68	76		73.6667		2.848
3.5	85	77	82		81.3333		2.33333
conc (uM)	Dy				AVERAGE		SE
0	11	13	12		12		0.57735
0.35	18	16	16		16.6667		0.666667
0.7	22	21	22		21.6667		0.333333
1.05	27	25	28		26.6667		0.881917
1.4	34	36	34		34.6667		0.666667
1.75	41	42	42		41.6667		0.333333
2.1	45	49	44		46		1.52753
2.45	53	56	52		53.6667		1.20185
2.8	61	62	64		62.3333		0.881917
3.15	64	69	66		66.3333		1.45297
3.5	79	77	75		77		1.1547
conc (uM)	Sm				AVERAGE		SE
0	12	12	13		12.3333		0.333333
0.35	17	18	17		17.3333		0.333333
0.7	21	21	23		21.6667		0.666667
1.05	30	29	29		29.3333		0.333333
1.4	32	35	36		34.3333		1.20185
1.75	40	41	45		42		1.52753
2.1	46	49	51		48.6667		1.45297
2.45	53	60	56		56.3333		2.02759
2.8	61	61	63		61.6667		0.666667
3.15	69	67	75		70.3333		2.4037
3.5	83	79	79		80.3333		1.33333
conc (uM)	Zr				AVERAGE		SE
0	11	12	10		11		0.57735
0.35	17	15	16		16		0.57735
0.7	22	20	24		22		1.1547
1.05	26	25	28		26.3333		0.881917
1.4	34	33	35		34		0.57735
1.75	39	41	40		40		0.57735
2.1	48	46	46		46.6667		0.666667
2.45	54	55	51		53.3333		1.20185
2.8	60	60	63		61		1
3.15	62	65	66		64.3333		1.20185
3.5	71	69	72		70.6667		0.881917
conc (uM)	Gd				AVERAGE		SE
0	15	15	12		14		1
0.35	18	17	17		17.3333		0.333333
0.7	22	21	22		21.6667		0.333333
1.05	25	27	27		26.3333		0.666667
1.4	35	36	35		35.3333		0.333333
1.75	41	39	40		40		0.57735
2.1	45	47	45		45.6667		0.666667
2.45	55	57	56		56		0.57735
2.8	62	68	68		66		2
3.15	70	65	69		68		1.52753
3.5	72	78	73		74.3333		1.85592
conc (uM)	Eu				AVERAGE		SE
0	13	14	13		13.3333		0.333333
0.35	18	17	16		17		0.57735
0.7	24	23	26		24.3333		0.881917
1.05	28	29	30		29		0.57735
1.4	34	36	38		36		1.1547
1.75	45	41	44		43.3333		1.20185
2.1	52	53	51		52		0.57735
2.45	62	58	55		58.3333		2.02759
2.8	65	67	66		66		0.57735
3.15	79	74	80		77.6667		1.85592
3.5	88	78	80		82		3.05505
conc (uM)	Tb				AVERAGE		SE
0	9	8	10		9		0.57735
0.35	17	15	16		16		0.57735
0.7	22	23	21		22		0.57735
1.05	29	27	29		28.3333		0.666667
1.4	39	39	39		39		0
1.75	43	45	44		44		0.57735
2.1	50	56	55		53.6667		1.85592
2.45	60	62	57		59.6667		1.45297
2.8	73	69	67		69.6667		1.76383
3.15	75	77	78		76.6667		0.881917
3.5	82	88	85		85		1.73205
conc (uM)	Mo				AVERAGE		SE
0	11	12	13		12		0.57735
0.35	15	14	16		15		0.57735
0.7	18	18	16		17.3333		0.666667
1.05	18	19	17		18		0.57735
1.4	17	16	19		17.3333		0.881917
1.75	19	19	20		19.3333		0.333333
2.1	21	18	20		19.6667		0.881917
2.45	20	20	19		19.6667		0.333333
2.8	20	21	22		21		0.57735
3.15	18	19	19		18.6667		0.333333
3.5	18	19	22		19.6667		1.20185
conc (uM)	Sc				AVERAGE		SE
0	15	14	12		13.6667		0.881917
0.35	18	16	18		17.3333		0.666667
0.7	21	22	22		21.6667		0.333333
1.05	25	24	27		25.3333		0.881917
1.4	33	33	35		33.6667		0.666667
1.75	40	41	42		41		0.57735
2.1	48	47	48		47.6667		0.333333
2.45	55	52	53		53.3333		0.881917
2.8	60	59	63		60.6667		1.20185
3.15	67	67	66		66.6667		0.333333
3.5	73	72	75		73.3333		0.881917
conc (uM)	Hf				AVERAGE		SE
0	16	15	13		14.6667		0.881917
0.35	19	18	19		18.6667		0.333333
0.7	24	25	24		24.3333		0.333333
1.05	32	35	32		33		1
1.4	37	39	37		37.6667		0.666667
1.75	47	51	51		49.6667		1.33333
2.1	54	58	56		56		1.1547
2.45	64	60	60		61.3333		1.33333
2.8	70	75	69		71.3333		1.85592
3.15	82	85	78		81.6667		2.02759
3.5	85	85	97		89		4
conc (uM)	V				AVERAGE		SE
0	11	9	11		10.3333		0.666667
0.35	14	14	14		14		0
0.7	29	18	22		23		3.21455
1.05	28	27	25		26.6667		0.881917
1.4	23	31	30		28		2.51661
1.75	31	38	37		35.3333		2.18581
2.1	48	44	44		45.3333		1.33333
2.45	44	49	55		49.3333		3.1798
2.8	84	60	57		67		8.544
3.15	64	64	62		63.3333		0.666667
3.5	77	75	71		74.3333		1.76383
conc (uM)	Ni				AVERAGE		SE
0	9	9	10		9.33333		0.333333
0.35	16	16	16		16		0
0.7	19	17	20		18.6667		0.881917
1.05	27	26	23		25.3333		1.20185
1.4	32	30	29		30.3333		0.881917
1.75	35	35	37		35.6667		0.666667
2.1	46	44	44		44.6667		0.666667
2.45	49	53	48		50		1.52753
2.8	59	56	56		57		1
3.15	62	64	66		64		1.1547
3.5	59	69	70		66		3.51188
conc (uM)	Cu				AVERAGE		SE
0	11	10	10		10.3333		0.333333
0.35	14	13	13		13.3333		0.333333
0.7	17	16	18		17		0.57735
1.05	21	22	21		21.3333		0.333333
1.4	29	26	28		27.6667		0.881917
1.75	36	34	32		34		1.1547
2.1	42	38	40		40		1.1547
2.45	47	43	45		45		1.1547
2.8	53	53	57		54.3333		1.33333
3.15	59	59	58		58.6667		0.333333
3.5	70	61	64		65		2.64575
conc (uM)	Si				AVERAGE		SE
0	8	9	8		8.33333		0.333333
0.35	19	18	20		19		0.57735
0.7	27	28	26		27		0.57735
1.05	35	36	32		34.3333		1.20185
1.4	42	43	41		42		0.57735
1.75	55	49	52		52		1.73205
2.1	60	58	59		59		0.57735
2.45	66	65	59		63.3333		2.18581
2.8	70	73	70		71		1
3.15	86	86	78		83.3333		2.66667
3.5	89	84	83		85.3333		1.85592
conc (uM)	Al				AVERAGE		SE
0	8	9	8		8.33333		0.333333
0.35	12	14	13		13		0.57735
0.7	18	18	19		18.3333		0.333333
1.05	23	23	22		22.6667		0.333333
1.4	30	28	26		28		1.1547
1.75	35	32	30		32.3333		1.45297
2.1	42	42	36		40		2
2.45	50	46	52		49.3333		1.76383
2.8	55	52	51		52.6667		1.20185
3.15	55	58	62		58.3333		2.02759
3.5	73	75	67		71.6667		2.4037
conc (uM)	Fe				AVERAGE		SE
0	10	9	8		9		0.57735
0.35	12	12	11		11.6667		0.333333
0.7	14	17	17		16		1
1.05	19	25	22		22		1.73205
1.4	28	27	27		27.3333		0.333333
1.75	32	36	32		33.3333		1.33333
2.1	37	39	39		38.3333		0.666667
2.45	45	44	43		44		0.57735
2.8	51	52	52		51.6667		0.333333
3.15	57	58	56		57		0.57735
3.5	63	62	65		63.3333		0.881917
conc (uM)	Zn				AVERAGE		SE
0	11	13	12		12		0.57735
0.35	17	15	14		15.3333		0.881917
0.7	18	21	20		19.6667		0.881917
1.05	26	30	27		27.6667		1.20185
1.4	35	33	37		35		1.1547
1.75	38	38	41		39		1
2.1	46	47	47		46.6667		0.333333
2.45	49	54	54		52.3333		1.66667
2.8	63	64	61		62.6667		0.881917
3.15	64	70	69		67.6667		1.85592
3.5	69	71	75		71.6667		1.76383
conc (uM)	Ti				AVERAGE		SE
0	13	12	13		12.6667		0.333333
0.35	14	17	15		15.3333		0.881917
0.7	17	19	17		17.6667		0.666667
1.05	23	23	23		23		0
1.4	29	27	30		28.6667		0.881917
1.75	30	31	31		30.6667		0.333333
2.1	39	34	37		36.6667		1.45297
2.45	40	41	44		41.6667		1.20185
2.8	50	46	44		46.6667		1.76383
3.15	45	52	52		49.6667		2.33333
3.5	51	55	61		55.6667		2.90593
4.5	71	73	71		71.6667		0.666667

## Sheet: SOSG quenching
conc (nM)	CONTROL				AVERAGE		SE
0	21	17	19		19		1.1547
12.5	228	278	264		256.667		14.8922
25	444	517	507		489.333		22.8498
37.5	646	728	729		701		27.5015
50	893	944	939		925.333		16.231
62.5	1124	1202	1197		1174.33		25.208
75	1209	1323	1330		1287.33		39.2188
87.5	1375	1525	1521		1473.67		49.3468
100	1601	1653	1682		1645.33		23.6948
112.5	1680	1731	1822		1744.33		41.5304
125	2291	2462	2485		2412.67		61.1946
conc (nM)	Fe				AVERAGE		SE
0.0	10	11	9		10		0.57735
12.5	266	255	262		261		3.21455
25.0	525	518	525		522.667		2.33333
37.5	729	741	736		735.333		3.4801
50.0	988	953	965		968.667		10.2686
62.5	1193	1202	1215		1203.33		6.38575
75.0	1326	1280	1285		1297		14.5717
87.5	1474	1477	1505		1485.33		9.8714
100.0	1613	1694	1677		1661.33		24.6599
112.5	1808	1754	1777		1779.67		15.6454
125.0	2469	2388	2384		2413.67		27.6908
conc (nM)	Sc				AVERAGE		SE
0.0	19	19	20		19.3333		0.333333
12.5	299	303	282		294.667		6.43774
25.0	542	553	554		549.667		3.84419
37.5	776	770	762		769.333		4.05518
50.0	1022	1002	999		1007.67		7.2188
62.5	1291	1306	1285		1294		6.245
75.0	1435	1403	1394		1410.67		12.441
87.5	1585	1600	1599		1594.67		4.84195
100.0	1828	1766	1761		1785		21.5484
112.5	1860	1892	1898		1883.33		11.7945
125.0	2531	2521	2512		2521.33		5.48736
conc (nM)	Cu				AVERAGE		SE
0.0	14	16	16		15.3333		0.666667
12.5	257	265	249		257		4.6188
25.0	459	490	484		477.667		9.49269
37.5	693	655	658		668.667		12.1974
50.0	891	863	893		882.333		9.68389
62.5	1105	1128	1150		1127.67		12.9915
75.0	1254	1196	1232		1227.33		16.905
87.5	1374	1407	1359		1380		14.1774
100.0	1559	1557	1547		1554.33		3.71184
112.5	1598	1644	1703		1648.33		30.3882
125.0	2276	2202	2201		2226.33		24.835
conc (nM)	Ni				AVERAGE		SE
0.0	9	9	7		8.33333		0.666667
12.5	391	256	270		305.667		42.8576
25.0	573	517	521		537		18.037
37.5	659	724	719		700.667		20.8833
50.0	1038	963	952		984.333		27.0206
62.5	1635	1239	1274		1382.67		126.571
75.0	1373	1396	1391		1386.67		6.98411
87.5	2367	1575	1529		1823.67		271.991
100.0	2311	1779	1808		1966		172.703
112.5	2036	1885	1864		1928.33		54.1736
125.0	2400	2615	2635		2550		75.2219
conc (nM)	V				AVERAGE		SE
0.0	12	11	13		12		0.57735
12.5	36	42	36		38		2
25.0	80	91	152		107.667		22.393
37.5	583	589	657		609.667		23.73
50.0	887	917	861		888.333		16.1795
62.5	1184	1182	1226		1197.33		14.345
75.0	1362	1294	1330		1328.67		19.6412
87.5	1498	1519	1556		1524.33		16.9542
100.0	1718	1689	1684		1697		10.5987
112.5	1842	1844	1822		1836		7.02377
125.0	2455	2524	2451		2476.67		23.6948
conc (nM)	Al				AVERAGE		SE
0.0	11	14	17		14		1.73205
12.5	265	276	268		269.667		3.28295
25.0	526	522	526		524.667		1.33333
37.5	726	741	717		728		7
50.0	982	975	967		974.667		4.33333
62.5	1274	1257	1255		1262		6.02771
75.0	1351	1327	1369		1349		12.1655
87.5	1571	1540	1559		1556.67		9.02466
100.0	1805	1793	1745		1781		18.3303
112.5	1905	1871	1892		1889.33		9.90511
125.0	2499	2506	2490		2498.33		4.63081
conc (nM)	Si				AVERAGE		SE
0.0	17	18	19		18		0.57735
12.5	279	272	274		275		2.08167
25.0	510	508	536		518		9.0185
37.5	720	731	714		721.667		4.97773
50.0	926	947	948		940.333		7.17248
62.5	1214	1235	1208		1219		8.18535
75.0	1270	1305	1319		1298		14.5717
87.5	1495	1523	1482		1500		12.0968
100.0	1722	1688	1670		1693.33		15.2461
112.5	1783	1798	1809		1796.67		7.5351
125.0	2415	2453	2458		2442		13.5769
conc (nM)	Zr				AVERAGE		SE
0.0	19	22	20		20.3333		0.881917
12.5	278	283	295		285.333		5.04425
25.0	542	547	535		541.333		3.4801
37.5	741	755	761		752.333		5.92546
50.0	979	1010	990		993		9.07377
62.5	1299	1274	1277		1283.33		7.88106
75.0	1366	1405	1405		1392		13
87.5	1602	1648	1576		1608.67		21.0502
100.0	1757	1793	1741		1763.67		15.3768
112.5	1915	1890	1832		1879		24.5832
125.0	2559	2539	2588		2562		14.2244
conc (nM)	Dy				AVERAGE		SE
0.0	18	20	17		18.3333		0.881917
12.5	292	305	299		298.667		3.75648
25.0	549	560	554		554.333		3.1798
37.5	771	798	814		794.333		12.5477
50.0	1102	1054	1065		1073.67		14.5182
62.5	1316	1364	1348		1342.67		14.1107
75.0	1501	1502	1462		1488.33		13.1698
87.5	1678	1674	1676		1676		1.1547
100.0	1878	1905	1835		1872.67		20.3825
112.5	2008	1971	1957		1978.67		15.2133
125.0	2787	2745	2599		2710.33		56.9717
conc (nM)	Eu				AVERAGE		SE
0.0	19	20	19		19.3333		0.333333
12.5	322	341	326		329.667		5.78312
25.0	633	638	638		636.333		1.66667
37.5	887	872	893		884		6.245
50.0	1151	1176	1182		1169.67		9.49269
62.5	1518	1459	1503		1493.33		17.7044
75.0	1647	1611	1646		1634.67		11.8369
87.5	1898	1800	1837		1845		28.5715
100.0	2099	2102	2062		2087.67		12.8625
112.5	2276	2185	2168		2209.67		33.5278
125.0	2905	3050	2940		2965		43.6845
conc (nM)	Sm				AVERAGE		SE
0.0	20	22	20		20.6667		0.666667
12.5	312	328	315		318.333		4.91031
25.0	604	608	593		601.667		4.48454
37.5	811	860	836		835.667		14.1461
50.0	1109	1129	1109		1115.67		6.66667
62.5	1454	1389	1424		1422.33		18.7824
75.0	1508	1519	1523		1516.67		4.48454
87.5	1771	1736	1803		1770		19.3477
100.0	1975	1963	1990		1976		7.81025
112.5	2140	2058	2066		2088		26.1024
125.0	2810	2813	2816		2813		1.73205
conc (nM)	Mo				AVERAGE		SE
0.0	20	19	22		20.3333		0.881917
12.5	121	133	121		125		4
25.0	484	498	509		497		7.23418
37.5	721	744	717		727.333		8.41295
50.0	1015	987	1025		1009		11.3725
62.5	1291	1313	1284		1296		8.73689
75.0	1414	1390	1362		1388.67		15.0259
87.5	1559	1568	1538		1555		8.88819
100.0	1774	1722	1729		1741.67		16.2925
112.5	1877	1873	1866		1872		3.21455
125.0	2531	2556	2501		2529.33		15.899
conc (nM)	Tb				AVERAGE		SE
0.0	11	12	13		12		0.57735
12.5	257	253	268		259.333		4.48454
25.0	549	557	542		549.333		4.33333
37.5	769	775	786		776.667		4.97773
50.0	1060	1032	1036		1042.67		8.74325
62.5	1304	1346	1377		1342.33		21.1529
75.0	1463	1459	1452		1458		3.21455
87.5	1690	1680	1696		1688.67		4.66667
100.0	1926	1951	1887		1921.33		18.622
112.5	2054	2014	2009		2025.67		14.24
125.0	2718	2743	2779		2746.67		17.7044
conc (nM)	Er				AVERAGE		SE
0.0	17	19	17		17.6667		0.666667
12.5	297	302	290		296.333		3.4801
25.0	552	582	563		565.667		8.76229
37.5	832	796	799		809		11.5326
50.0	1050	1058	1046		1051.33		3.52767
62.5	1343	1362	1370		1358.33		8.00694
75.0	1452	1446	1504		1467.33		18.415
87.5	1678	1692	1693		1687.67		4.84195
100.0	1884	1886	1916		1895.33		10.3494
112.5	2040	1949	2054		2014.33		32.9157
125.0	2751	2717	2683		2717		19.6299
conc (nM)	Nd				AVERAGE		SE
0.0	20	21	22		21		0.57735
12.5	328	337	331		332		2.64575
25.0	651	651	626		642.667		8.33333
37.5	873	889	865		875.667		7.05534
50.0	1174	1164	1181		1173		4.93288
62.5	1482	1533	1553		1522.67		21.1371
75.0	1673	1649	1649		1657		8
87.5	1847	1853	1871		1857		7.2111
100.0	2138	2073	2137		2116		21.5019
112.5	2256	2254	2290		2266.67		11.6809
125.0	3026	2989	3014		3009.67		10.8985
conc (nM)	Hf				AVERAGE		SE
0.0	17	19	16		17.3333		0.881917
12.5	330	347	349		342		6.02771
25.0	645	673	633		650.333		11.8509
37.5	885	928	889		900.667		13.7154
50.0	1226	1202	1211		1213		7
62.5	1529	1580	1478		1529		29.4449
75.0	1681	1651	1666		1666		8.66025
87.5	1916	1829	1859		1868		25.5147
100.0	2070	2063	2095		2076		9.71253
112.5	2228	2256	2202		2228.67		15.592
125.0	3045	3060	3032		3045.67		8.08977
conc (nM)	Cr				AVERAGE		SE
0.0	17	16	18		17		0.57735
12.5	295	297	298		296.667		0.881917
25.0	551	552	563		555.333		3.84419
37.5	770	780	753		767.667		7.88106
50.0	1022	1014	1031		1022.33		4.91031
62.5	1309	1299	1335		1314.33		10.729
75.0	1437	1442	1404		1427.67		11.921
87.5	1617	1649	1633		1633		9.2376
100.0	1768	1812	1855		1811.67		25.1153
112.5	1887	1992	1949		1942.67		30.4759
125.0	2666	2668	2550		2628		39.0043
conc (nM)	Co				AVERAGE		SE
0.0	17	18	16		17		0.57735
12.5	254	251	262		255.667		3.28295
25.0	487	475	490		484		4.58258
37.5	679	697	707		694.333		8.19214
50.0	929	905	912		915.333		7.12585
62.5	1200	1137	1188		1175		19.3132
75.0	1295	1255	1308		1286		15.9478
87.5	1473	1474	1454		1467		6.50641
100.0	1675	1627	1701		1667.67		21.6744
112.5	1806	1720	1770		1765.33		24.9355
125.0	2382	2379	2404		2388.33		7.88106
conc (nM)	Mn				AVERAGE		SE
0.0	12	10	11		11		0.57735
12.5	254	257	259		256.667		1.45297
25.0	475	492	494		487		6.02771
37.5	667	695	683		681.667		8.11035
50.0	877	878	901		885.333		7.83865
62.5	1116	1104	1134		1118		8.7178
75.0	1208	1215	1208		1210.33		2.33333
87.5	1412	1418	1399		1409.67		5.60753
100.0	1576	1554	1577		1569		7.50555
112.5	1672	1678	1633		1661		14.1067
125.0	2185	2241	2248		2224.67		19.936
conc (nM)	Gd				AVERAGE		SE
0.0	20	20	26		22		2
12.5	355	326	326		335.667		9.66667
25.0	664	616	612		630.667		16.7066
37.5	889	867	847		867.667		12.1289
50.0	1147	1170	1186		1167.67		11.3186
62.5	1537	1521	1563		1540.33		12.2384
75.0	1642	1595	1691		1642.67		27.7148
87.5	1886	1848	1887		1873.67		12.8366
100.0	2110	2081	2106		2099		9.07377
112.5	2271	2265	2243		2259.67		8.51143
125.0	3047	3082	3012		3047		20.2073
conc (nM)	Zn				AVERAGE		SE
0.0	20	20	20		20		0
12.5	278	266	272		272		3.4641
25.0	565	558	546		556.333		5.54777
37.5	744	763	767		758		7.0946
50.0	1017	1019	1024		1020		2.08167
62.5	1305	1325	1332		1320.67		8.08977
75.0	1415	1395	1415		1408.33		6.66667
87.5	1646	1606	1615		1622.33		12.1152
100.0	1807	1808	1771		1795.33		12.1701
112.5	1934	1899	1945		1926		13.8684
125.0	2536	2587	2593		2572		18.0831
conc (nM)	Ti				AVERAGE		SE
0.0	23	24	24		23.6667		0.333333
12.5	310	313	301		308		3.60555
25.0	589	585	584		586		1.52753
37.5	850	867	842		853		7.37111
50.0	1105	1095	1111		1103.67		4.66667
62.5	1310	1360	1381		1350.33		21.0581
75.0	1639	1618	1615		1624		7.54983
87.5	1869	1881	1891		1880.33		6.35959
100.0	2117	2086	2112		2105		9.60902
112.5	2248	2246	2282		2258.67		11.6809
125.0	2961	2926	2951		2946		10.4083

## Sheet: CCA raw fluorescence
	Raw Fluorescence				7OH-CCA uM
CCA CONTROL run 1								Average
0	69	67	66		0.23	0.214	0.207	0.217
Co	70	69	70		0.189	0.182	0.189	0.186667
Mn	59	58	62		0.133	0.126	0.157	0.138667
Ti	93	91	92		0.193	0.181	0.188	0.187333
Ni	70	57	55		0.143	0.087	0.079	0.103
Si	60	65	61		0.1	0.128	0.106	0.111333
Zn	60	60	58		0.024	0.024	0.02	0.0226667
Al	60	57	65		0.087	0.074	0.108	0.0896667
Mo	79	75	76		0.229	0.13	0.152	0.170333
Dy	45	45	44		0	0	0	0
Er	46	43	47		0.011	0.017	0.012	0.0133333
Cr	60	64	64		0.095	0.115	0.115	0.108333
Gd	68	74	67		0.018	0.023	0.017	0.0193333
Zr	63	64	65		0.079	0.084	0.089	0.084
Hf	67	67	73		0.066	0.066	0.095	0.0756667
V	59	58	64		1.46	1.411	1.72	1.53033
Sc	73	69	72		0.12	0.102	0.116	0.112667
Eu	58	51	54		0.001	0	0	0.000333333
Sm	51	51	51		0.006	0.006	0.006	0.006
Fe	55	54	58		0.111	0.105	0.129	0.115
Cu	68	65	59		0.144	0.129	0.098	0.123667
Nd	53	45	52		0.004	0	0.003	0.00233333
Tb	35	38	34		0	0.012	0	0.004
CCA IRRADIATED run 1
0	99	102	99		0.465	0.49	0.465	0.473333
Co	90	95	97		0.305	0.334	0.345	0.328
Mn	87	88	85		0.341	0.348	0.325	0.338
Ti	125	129	128		0.36	0.381	0.376	0.372333
Ni	82	83	78		0.194	0.198	0.177	0.189667
Si	97	96	102		0.302	0.296	0.325	0.307667
Zn	126	118	111		0.194	0.174	0.156	0.174667
Al	90	89	89		0.212	0.208	0.208	0.209333
Mo	73	91	88		0.084	0.541	0.461	0.362
Dy	52	52	55		0.015	0.015	0.022	0.0173333
Er	47	47	55		0.013	0.013	0.025	0.017
Cr	111	119	125		0.34	0.379	0.408	0.375667
Gd	65	66	75		0.015	0.016	0.024	0.0183333
Zr	94	99	98		0.248	0.276	0.27	0.264667
Hf	113	117	113		0.288	0.307	0.288	0.294333
V	109	118	119		3.336	3.405	3.411	3.384
Sc	104	98	101		0.27	0.242	0.256	0.256
Eu	58	59	55		0.001	0.002	0	0.001
Sm	52	59	55		0.007	0.018	0.012	0.0123333
Fe	88	85	90		0.31	0.292	0.322	0.308
Cu	93	89	94		0.275	0.254	0.281	0.27
Nd	54	52	55		0.005	0.003	0.007	0.005
Tb	42	37	42		0.035	0.007	0.035	0.0256667
CCA CONTROL run 2
0	59	57	57		0.151	0.136	0.136	0.141
Co	45	52	50		0.043	0.084	0.072	0.0663333
Mn	45	46	41		0.023	0.039	0	0.0206667
Ti	91	99	95		0.181	0.224	0.204	0.203
Ni	49	46	44		0.054	0.041	0.033	0.0426667
Si	54	56	54		0.069	0.079	0.069	0.0723333
Zn	52	49	54		0.004	0	0.009	0.00433333
Al	52	57	64		0.054	0.075	0.104	0.0776667
Mo	66	70	71		0	0.005	0.03	0.0116667
Dy	58	56	59		0.028	0.024	0.03	0.0273333
Er	46	45	45		0.011	0.01	0.01	0.0103333
Cr	54	54	62		0.069	0.069	0.104	0.0806667
Gd	51	54	55		0.002	0.005	0.006	0.00433333
Zr	55	55	59		0.034	0.034	0.056	0.0413333
Hf	68	68	71		0.071	0.071	0.085	0.0756667
V	55	60	66		1.28	1.52	2.21	1.67
Sc	70	67	77		0.107	0.091	0.14	0.112667
Eu	63	66	63		0.004	0.006	0.004	0.00466667
Sm	63	56	63		0.024	0.014	0.024	0.0206667
Fe	48	52	54		0.069	0.094	0.105	0.0893333
Cu	55	51	54		0.077	0.056	0.071	0.068
Nd	51	53	50		0.001	0.004	0	0.00166667
Tb	30	30	31		0	0	0	0
CCA IRRADIATED run 2
0	73	76	85		0.262	0.286	0.356	0.301333
Co	65	66	68		0.159	0.165	0.177	0.167
Mn	70	78	81		0.215	0.274	0.295	0.261333
Ti	90	98	110		0.177	0.219	0.282	0.226
Ni	61	64	65		0.104	0.117	0.121	0.114
Si	70	77	81		0.0155	0.193	0.214	0.140833
Zn	147	154	150		0.247	0.266	0.256	0.256333
Al	75	72	80		0.15	0.137	0.17	0.152333
Mo	78	82	78		0.203	0.304	0.203	0.236667
Dy	64	63	55		0.041	0.04	0.022	0.0343333
Er	44	51	44		0.009	0.02	0.009	0.0126667
Cr	95	87	105		0.263	0.225	0.311	0.266333
Gd	70	67	65		0.019	0.017	0.015	0.017
Zr	71	71	70		0.123	0.123	0.117	0.121
Hf	113	109	112		0.288	0.269	0.284	0.280333
V	96	96	115		3.242	3.242	3.381	3.28833
Sc	103	106	103		0.266	0.281	0.266	0.271
Eu	78	75	79		0.014	0.012	0.014	0.0133333
Sm	56	65	57		0.014	0.027	0.016	0.019
Fe	80	77	76		0.262	0.244	0.238	0.248
Cu	89	83	81		0.254	0.223	0.212	0.229667
Nd	63	60	57		0.016	0.014	0.009	0.013
Tb	35	34	36		0	0	0.001	0.000333333
CCA CONTROL run 3
0	69	78	69		0.23	0.301	0.23	0.253667
Co	56	61	59		0.106	0.135	0.124	0.121667
Mn	43	48	44		0.017	0.052	0.023	0.0306667
Ti	85	89	87		0.15	0.171	0.161	0.160667
Ni	52	49	45		0.066	0.054	0.037	0.0523333
Si	66	66	62		0.133	0.133	0.111	0.125667
Zn	82	85	82		0.081	0.089	0.081	0.0836667
Al	63	63	66		0.1	0.1	0.112	0.104
Mo	85	82	76		0.385	0.304	0.152	0.280333
Dy	83	73	73		0.082	0.06	0.06	0.0673333
Er	61	55	58		0.035	0.024	0.03	0.0296667
Cr	63	58	63		0.11	0.088	0.11	0.102667
Gd	72	73	77		0.021	0.022	0.025	0.0226667
Zr	68	69	69		0.105	0.111	0.111	0.109
Hf	79	76	79		0.124	0.11	0.124	0.119333
V	60	52	61		1.515	1.14	1.569	1.408
Sc	82	82	93		0.164	0.164	0.217	0.181667
Eu	77	79	82		0.012	0.014	0.016	0.014
Sm	73	70	70		0.04	0.035	0.035	0.0366667
Fe	57	59	60		0.123	0.135	0.142	0.133333
Cu	68	69	64		0.145	0.15	0.123	0.139333
Nd	68	76	70		0.024	0.034	0.026	0.028
Tb	38	34	31		0.013	0	0	0.00433333
CCA IRRADIATED run 3
0	79	78	82		0.308	0.301	0.332	0.313667
Co	73	68	75		0.205	0.177	0.217	0.199667
Mn	78	77	77		0.274	0.267	0.267	0.269333
Ti	98	95	94		0.219	0.202	0.198	0.206333
Ni	65	67	78		0.121	0.13	0.177	0.142667
Si	73	77	78		0.171	0.193	0.199	0.187667
Zn	154	156	161		0.266	0.271	0.284	0.273667
Al	79	72	115		0.166	0.134	0.317	0.205667
Mo	103	103	100		0.835	0.835	0.772	0.814
Dy	91	79	72		0.098	0.074	0.059	0.077
Er	48	51	50		0.015	0.02	0.018	0.0176667
Cr	96	92	100		0.269	0.25	0.288	0.269
Gd	96	94	83		0.042	0.041	0.031	0.038
Zr	78	79	77		0.16	0.165	0.154	0.159667
Hf	116	122	119		0.304	0.333	0.318	0.318333
V	111	103	114		3.353	3.29	3.375	3.33933
Sc	83	81	89		0.169	0.159	0.198	0.175333
Eu	85	85	81		0.017	0.017	0.015	0.0163333
Sm	69	70	68		0.034	0.035	0.032	0.0336667
Fe	87	87	94		0.304	0.304	0.346	0.318
Cu	92	94	86		0.27	0.281	0.239	0.263333
Nd	64	65	69		0.018	0.02	0.025	0.021
Tb	37	51	35		0.007	0.083	0	0.03

## Sheet: DHE raw fluorescence
	Raw fluorescence				Ethidium uM
DHE CONTROL run 1								Average
0	15	14	13		0.35	0.29	0.21	0.283333
Co	21	22	23		0.92	0.98	1.03	0.976667
Mn	50	51	55		2.75	2.8	3	2.85
Ti	13	13	11		0	0	0	0
Ni	25	26	24		1.03	1.09	0.98	1.03333
Si	17	15	15		0.28	0.22	0.22	0.24
Zn	22	24	25		0.8	0.89	0.94	0.876667
Al	12	14	11		0.26	0.41	0.2	0.29
Mo	12	12	12		0	0	0	0
Dy	13	11	11		0.06	0	0	0.02
Er	11	13	13		0.02	0.14	0.14	0.1
Cr	17	16	16		0.52	0.47	0.47	0.486667
Gd	14	13	12		0	0	0	0
Zr	12	11	14		0.06	0	0.2	0.0866667
Hf	14	15	15		0	0.03	0.03	0.02
V	26	27	24		0.98	1.1	0.79	0.956667
Sc	14	13	13		0.02	0	0	0.00666667
Eu	14	13	14		0.04	0	0.04	0.0266667
Sm	12	11	15		0	0	0.18	0.06
Fe	10	12	11		0.12	0.37	0.27	0.253333
Cu	29	28	26		1.46	1.41	1.3	1.39
Nd	11	13	11		0	0.06	0	0.02
Tb	33	34	35		1.2	1.23	1.27	1.23333
DHE IRRADIATED run 1
0	34	37	31		1.74	1.91	1.57	1.74
Co	38	40	41		1.99	2.12	2.15	2.08667
Mn	55	58	53		3	3.17	2.9	3.02333
Ti	26	29	28		1.23	1.44	1.36	1.34333
Ni	49	41	45		2.38	1.95	2.12	2.15
Si	40	39	39		1.3	1.26	1.26	1.27333
Zn	54	49	50		2.5	2.24	2.31	2.35
Al	31	30	26		1.63	1.57	1.26	1.48667
Mo	15	13	15		0.33	0.11	0.33	0.256667
Dy	30	27	30		1.19	1.06	1.19	1.14667
Er	30	33	34		1.11	1.26	1.3	1.22333
Cr	34	33	37		1.55	1.5	1.68	1.57667
Gd	36	32	32		1.45	1.28	1.28	1.33667
Zr	33	31	34		1.34	1.26	1.4	1.33333
Hf	34	37	35		1.12	1.34	1.19	1.21667
V	31	33	31		1.54	1.63	1.54	1.57
Sc	35	32	29		1.46	1.33	1.2	1.33
Eu	36	36	34		1.4	1.4	1.3	1.36667
Sm	31	31	30		1.17	1.17	1.1	1.14667
Fe	31	29	32		1.61	1.5	1.67	1.59333
Cu	32	30	29		1.64	1.53	1.47	1.54667
Nd	29	28	29		1.09	1.03	1.09	1.07
Tb	47	52	47		1.85	2.04	1.85	1.91333
DHE CONTROL run 2
0	16	19	15		0.43	0.67	0.35	0.483333
Co	28	29	32		1.34	1.4	1.59	1.44333
Mn	43	42	39		2.34	2.27	2.08	2.23
Ti	23	21	23		1.05	0.91	1.05	1.00333
Ni	27	29	24		1.16	1.3	0.98	1.14667
Si	18	17	21		0.31	0.28	0.44	0.343333
Zn	17	17	18		0.49	0.49	0.56	0.513333
Al	15	16	17		0.49	0.55	0.62	0.553333
Mo	13	15	17		0.11	0.33	0.55	0.33
Dy	16	16	21		0.3	0.3	0.65	0.416667
Er	18	17	17		0.42	0.38	0.38	0.393333
Cr	19	21	20		0.62	0.71	0.66	0.663333
Gd	22	20	19		0.72	0.55	0.49	0.586667
Zr	20	18	21		0.58	0.46	0.63	0.556667
Hf	21	20	20		0.5	0.43	0.43	0.453333
V	51	50	56		2.49	2.46	2.58	2.51
Sc	20	18	17		0.55	0.4	0.32	0.423333
Eu	20	20	18		0.5	0.5	0.4	0.466667
Sm	17	19	19		0.33	0.48	0.48	0.43
Fe	13	16	16		0.46	0.7	0.7	0.62
Cu	24	23	24		1.2	1.14	1.2	1.18
Nd	19	17	21		0.47	0.32	0.6	0.463333
Tb	40	43	44		1.48	1.67	1.75	1.63333
DHE IRRADIATED run 2
0	35	36	34		1.8	1.86	1.75	1.80333
Co	39	37	39		2.05	1.92	2.05	2.00667
Mn	44	43	43		2.41	2.34	2.34	2.36333
Ti	46	43	44		2.76	2.54	2.61	2.63667
Ni	48	44	47		2.31	2.07	2.24	2.20667
Si	39	38	36		1.26	1.21	1.12	1.19667
Zn	36	36	37		1.48	1.48	1.57	1.51
Al	37	32	39		1.96	1.72	2.04	1.90667
Mo	11	17	13		0	0.65	0.11	0.253333
Dy	40	36	37		1.67	1.46	1.52	1.55
Er	40	38	34		1.59	1.5	1.3	1.46333
Cr	40	37	38		1.84	1.68	1.73	1.75
Gd	39	39	41		1.67	1.67	1.8	1.71333
Zr	38	37	36		1.62	1.57	1.51	1.56667
Hf	41	41	41		1.49	1.49	1.49	1.49
V	48	48	51		2.33	2.33	2.49	2.38333
Sc	38	36	35		1.61	1.51	1.46	1.52667
Eu	40	43	42		1.59	1.73	1.68	1.66667
Sm	38	42	41		1.56	1.74	1.7	1.66667
Fe	32	35	33		1.67	1.86	1.72	1.75
Cu	37	37	35		1.93	1.93	1.8	1.88667
Nd	41	40	41		1.64	1.6	1.64	1.62667
Tb	65	63	64		2.64	2.56	2.6	2.6
DHE CONTROL run 3
0	15	16	14		0.35	0.42	0.28	0.35
Co	21	23	21		0.92	1.03	0.92	0.956667
Mn	59	56	56		3.2	3.06	3.06	3.10667
Ti	12	14	14		0	0.018	0.018	0.012
Ni	28	28	26		1.23	1.23	1.1	1.18667
Si	15	14	15		0.22	0.18	0.22	0.206667
Zn	15	14	17		0.31	0.2	0.49	0.333333
Al	12	13	12		0.26	0.34	0.26	0.286667
Mo	21	20	21		0.23	0.12	0.23	0.193333
Dy	14	14	14		0.14	0.14	0.14	0.14
Er	14	13	14		0.2	0.14	0.2	0.18
Cr	15	17	16		0.43	0.52	0.48	0.476667
Gd	16	13	17		0.21	0	0.3	0.17
Zr	19	16	18		0.52	0.35	0.46	0.443333
Hf	15	15	16		0	0	0.1	0.0333333
V	50	49	54		2.47	2.43	2.54	2.48
Sc	14	16	13		0	0.22	0	0.0733333
Eu	17	17	13		0.35	0.35	0	0.233333
Sm	15	13	13		0.19	0.04	0.04	0.09
Fe	12	12	13		0.39	0.39	0.46	0.413333
Cu	28	27	27		1.42	1.36	1.36	1.38
Nd	15	13	14		0.2	0.06	0.12	0.126667
Tb	34	32	30		1.23	1.17	1.1	1.16667
DHE IRRADIATED run 3
0	33	33	30		1.7	1.7	1.51	1.63667
Co	36	38	38		1.85	1.599	1.599	1.68267
Mn	58	62	75		3.16	3.33	3.75	3.41333
Ti	51	24	25		3.22	1.11	1.17	1.83333
Ni	47	45	44		2.25	2.13	2.08	2.15333
Si	39	43	37		1.26	1.43	1.16	1.28333
Zn	33	29	31		1.3	1.12	1.2	1.20667
Al	27	30	28		1.33	1.56	1.4	1.43
Mo	23	22	23		0.5	0.35	0.5	0.45
Dy	30	33	31		1.19	1.32	1.24	1.25
Er	34	31	36		1.31	1.15	1.41	1.29
Cr	29	29	30		1.3	1.3	1.36	1.32
Gd	32	34	33		1.26	1.35	1.31	1.30667
Zr	34	34	32		1.4	1.4	1.31	1.37
Hf	34	34	31		1.13	1.13	0.96	1.07333
V	52	53	52		2.5	2.52	2.5	2.50667
Sc	29	29	30		1.2	1.2	1.24	1.21333
Eu	36	35	38		1.4	1.35	1.5	1.41667
Sm	30	30	30		1.09	1.09	1.09	1.09
Fe	28	26	29		1.44	1.32	1.5	1.42
Cu	28	28	23		1.42	1.42	1.14	1.32667
Nd	30	31	28		1.14	1.2	1.03	1.12333
Tb	43	41	39		1.68	1.54	1.4	1.54

## Sheet: SOSG raw fluorescence
	Raw fluorescence				Singlet oxygen nM
SOSG CONTROL run 1								Average
Control	781	948	942		41.5	51.2	51.1	47.9333
Hf	1133	1147	1121		46.8	47.3	46.5	46.8667
Nd	1152	1147	1154		49	48.5	49.1	48.8667
Er	1053	1038	1016		49.8	49	47.9	48.9
Gd	1174	1147	1105		49.9	49	47.3	48.7333
Mo	339	331	332		19.8	19.5	19.6	19.6333
Tb	2221	2260	2314		115.9	116.6	117.4	116.633
Eu	1189	1199	1191		50.9	51.1	51	51
Sm	1089	1037	1093		48.8	46.1	49	47.9667
Zr	985	975	967		49.4	48.7	48.2	48.7667
Dy	1101	1108	1131		51.3	51.4	52.6	51.7667
Cr	980	979	986		47.9	47.9	48.2	48
Co	934	917	896		50.6	49.8	48.9	49.7667
Si	890	918	904		47	48.8	47.8	47.8667
Mn	894	914	900		50.5	51.2	50.7	50.8
Cu	887	948	921		50.7	53.3	51.8	51.9333
Ni	763	875	882		40.1	45	45.6	43.5667
Sc	992	1001	1013		49.1	49.2	49.9	49.4
Fe	923	916	939		47.4	47	48.2	47.5333
V	284	284	298		29.4	29.4	29.7	29.5
Al	979	951	934		50	48.7	47.6	48.7667
Zn	1020	1008	997		50.3	49.1	48.7	49.3667
Ti	694	729	726		30.1	31.8	31.7	31.2
SOSG IRRADIATED run 1
Control	1638	1775	1738		99.3	113	111	107.767
Hf	2293	2307	2299		113.5	113.7	113.6	113.6
Nd	1724	1779	1737		79	81.8	79.6	80.1333
Er	1621	1696	1716		83.4	87.7	89	86.7
Gd	1599	1552	1558		69.8	64.2	64.9	66.3
Mo	676	687	675		34.6	34.9	34.5	34.6667
Tb	2809	2808	2823		126	126	126.4	126.133
Eu	1613	1647	1702		72.9	76	78.9	75.9333
Sm	1577	1822	1800		77.8	90.7	89.4	85.9667
Zr	1868	1857	1825		110.7	110	107	109.233
Dy	1575	1622	1599		80.4	83.7	82.3	82.1333
Cr	1875	1885	1903		105.8	106.9	108.7	107.133
Co	1824	1828	1760		113.7	113.8	112.4	113.3
Si	1814	1782	1765		112.7	110.9	107.9	110.5
Mn	1484	1419	1449		93.3	88.2	90.3	90.6
Cu	1124	1160	1200		62.3	66	71.7	66.6667
Ni	1605	1592	1594		81.1	80.9	81	81
Sc	1971	1987	1958		114.2	114.4	113.8	114.133
Fe	1746	1703	1702		109.2	104.3	104.2	105.9
V	477	474	477		34.1	34	34.1	34.0667
Al	1861	1817	1771		109	104.3	99.3	104.2
Zn	1610	1633	1595		86.8	88.4	85.9	87.0333
Ti	1725	1742	1700		80	80.8	78.8	79.8667
SOSG CONTROL run 2
Control	945	1082	1051		50.8	58	56.1	54.9667
Hf	1298	1237	1296		53.3	50.5	53.2	52.3333
Nd	1302	1270	1266		54.6	53.2	53	53.6
Er	1170	1210	1192		54.9	56.6	55.8	55.7667
Gd	1294	1284	1286		54.1	53.6	53.7	53.8
Mo	386	378	381		21.2	20.8	21	21
Tb	3143	3145	3314		158.23	158.33	166.91	161.157
Eu	1393	1381	1390		58.7	58	58.3	58.3333
Sm	1237	1300	1240		54.8	57.4	55	55.7333
Zr	1128	1123	1094		55.7	55.5	54.1	55.1
Dy	1259	1228	1252		58.4	57	58.3	57.9
Cr	1121	1109	1175		54.1	53.7	56.6	54.8
Co	1067	1042	1044		57.4	56	56.1	56.5
Si	1026	1039	1077		54	54.5	56	54.8333
Mn	1017	1021	1029		56.8	57.2	57.6	57.2
Cu	1028	929	1071		57.5	52.2	59.9	56.5333
Ni	945	913	908		48.3	46.9	46.8	47.3333
Sc	1131	1143	1148		55.2	56	56.1	55.7667
Fe	1061	1044	1052		55.1	54	54.7	54.6
V	623	638	657		38.1	38.8	39.4	38.7667
Al	1107	1104	1068		55.9	55.8	54	55.2333
Zn	1151	1143	1157		55.5	55.1	55.9	55.5
Ti	796	758	737		34.8	32.9	31.6	33.1
SOSG IRRADIATED run 2
Control	1988	2077	2039		117.1	118.8	118	117.967
Hf	2646	2588	2567		118.9	118	117.7	118.2
Nd	1986	1988	1951		93.6	93.7	92.2	93.1667
Er	1877	1877	1884		98.8	98.8	105.7	101.1
Gd	1787	1803	1732		82.6	83.7	80	82.1
Mo	771	832	785		39.2	42.1	39.9	40.4
Tb	3557	3458	3706		179.24	174.22	186.8	180.087
Eu	1845	1809	1984		87.7	85.2	94.4	89.1
Sm	1761	2053	2026		87.5	108.9	105.8	100.733
Zr	2117	2107	2078		116.8	116.7	116	116.5
Dy	1798	1802	1853		95.1	95.6	98.7	96.4667
Cr	2121	2131	2199		115.8	116	117.1	116.3
Co	1993	1987	1973		117	116.9	116.6	116.833
Si	2010	2010	1973		116.7	116.7	116	116.467
Mn	1586	1628	1629		102.3	108.2	108.9	106.467
Cu	1279	1297	1346		79.1	80.8	85	81.6333
Ni	1694	1715	1695		84	84.6	84	84.2
Sc	2267	2229	2242		120	119.2	119.6	119.6
Fe	1909	1905	1878		115.1	115	114.4	114.833
V	1132	1172	1148		59.9	61.4	60.5	60.6
Al	2041	2052	2045		115.7	116	115.8	115.833
Zn	1784	1859	1827		99	116.5	103.9	106.467
Ti	1747	1841	1805		80.9	85.6	83.7	83.4
SOSG CONTROL run 3
0	534	624	620		27.1	32.6	32.5	30.7333
Hf	745	741	738		29.7	29.4	29.2	29.4333
Nd	755	779	750		31	32.1	30.8	31.3
Er	683	629	679		30.8	28	30.9	29.9
Gd	738	775	726		30.4	32.5	30	30.9667
Mo	213	197	191		15.3	14.8	14.1	14.7333
Tb	4233	4146	4357		213.5	209.1	219.8	214.133
Eu	788	818	804		32.2	34	33.5	33.2333
Sm	727	728	728		31.7	31.8	31.8	31.7667
Zr	615	605	605		29.2	28.8	28.8	28.9333
Dy	701	684	687		32.9	31.6	31.7	32.0667
Cr	655	650	652		30.7	30.6	30.6	30.6333
Co	621	625	605		33.1	33.2	32.2	32.8333
Si	586	569	613		28.9	28	30.9	29.2667
Mn	579	575	586		30.9	30.8	31.2	30.9667
Cu	585	599	504		32	33	26.9	30.6333
Ni	612	617	624		30.9	31	31.9	31.2667
Sc	662	649	660		31.1	30.6	31.1	30.9333
Fe	582	594	584		28.2	29	28.2	28.4667
V	226	233	241		27.9	28	28.2	28.0333
Al	612	602	601		30.4	29.8	29.8	30
Zn	632	643	652		29.2	30.7	31	30.3
Ti	760	742	738		33.1	32.2	31.9	32.4
SOSG IRRADIATED run 3
0	1265	1279	1316		71.6	74	76.9	74.1667
Hf	1763	1757	1780		80.8	81	81.9	81.2333
Nd	1257	1231	1226		53	52	51.9	52.3
Er	1277	1276	1235		59	59	57.1	58.3667
Gd	1268	1271	1259		53.2	53.2	53	53.1333
Mo	401	390	406		21.7	21.2	21.8	21.5667
Tb	3867	5032	4980		195	254.1	251.4	233.5
Eu	1336	1354	1346		56.1	57	56.8	56.6333
Sm	1267	1273	1298		55.9	56.4	57.3	56.5333
Zr	1423	1416	1388		76.6	76.5	74.1	75.7333
Dy	1082	1109	1085		50.2	51.5	50.3	50.6667
Cr	1507	1458	1537		80	76.5	81.5	79.3333
Co	1347	1364	1362		80	80.4	80.3	80.2333
Si	1295	1292	1279		74	73.9	71.6	73.1667
Mn	1083	1082	1074		60.7	60.7	60	60.4667
Cu	718	714	735		40.3	40.2	40.9	40.4667
Ni	1289	1357	1341		59.4	61.8	61.3	60.8333
Sc	1558	1571	1478		85	86	79.1	83.3667
Fe	1367	1389	1383		79.5	80.8	80.7	80.3333
V	471	463	476		34	33.9	34.1	34
Al	1380	1395	1407		77.1	77.4	78.4	77.6333
Zn	1197	1028	1226		57.3	50	58.2	55.1667
Ti	1802	1826	1826		83.8	84.9	84.9	84.5333
